# Supplementary material for: Bayesian inference of the number of factors in gene-expression analysis: application to human virus challenge studies
Source: Springer Nature journal article supplement (doi:10.1186/1471-2105-11-552), 2010-11-09

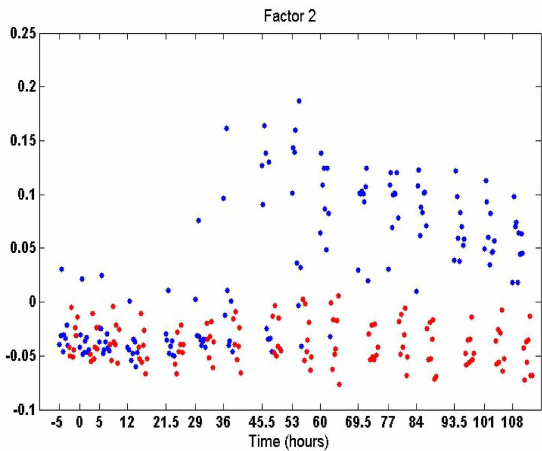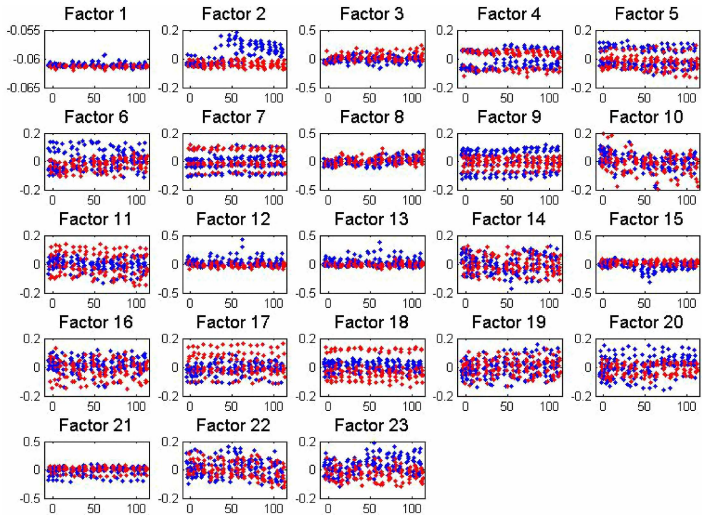

Supplement: 12859_2009_4135_MOESM5_ESM.pdf [file 12859_2009_4135_MOESM5_ESM.pdf]
